# Supplementary material for: Application of Metagenomic Next-Generation Sequencing in the Etiological Diagnosis of Infective Endocarditis During the Perioperative Period of Cardiac Surgery: A Prospective Cohort Study
Source: Front Cardiovasc Med. 2022 Mar 8;9:811492. doi: 10.3389/fcvm.2022.811492 (PMC8965566; doi:10.3389/fcvm.2022.811492)
Supplement: Supplementary file 2 [file Table_1.XLSX]

## Sheet: Sheet2
Patient ID	raw_reads	Q30	clean_reads	unmapped_reads	extracted DNA concentration(ng/μL）
1	13487103	93.01	13002749	263346	<0.1
2	13621537	89.59	13063524	236976	<0.1
3	5762260	94.92	5604062	82387	<0.1
4	10454525	91.9	10092107	315530	63.4
5	8085760	92.22	7855894	31584	<0.1
6	10490420	89.28	10200825	117995	<0.1
7	12137765	90.71	11820833	116669	<0.1
8	13279722	92.46	12795992	2469938	0.355
9	12826787	92.72	12442701	4077603	0.906
10	17380825	91.62	16590295	276943	42
11	16274448	93.02	15763949	1000696	11.7
12	14394784	93.88	14063586	2202147	<0.1
13	10802997	91.37	10494184	131449	<0.1
14	18878193	91.47	18032788	1249830	4.08
15	15100220	92.24	14612725	390243	20.6
16	20118778	92.76	19539239	570701	45.4
17	11597352	92.14	11005197	248251	0.882
18	14955534	92.29	14496334	510031	27.8
19	11829973	91.34	11362379	171803	26.4
20	29685174	93.17	28945283	1675378	<0.1
21	12149892	94.79	11950211	175283	<0.1
22	12157424	94.05	11884595	92257	<0.1
23	10131157	94.09	9851965	202416	<0.1
24	9854898	94.68	9683227	196018	<0.1
25	12347778	93.54	12076735	157491	<0.1
26	11478231	94.7	11261425	7340590	<0.1
27	16080014	92.83	15649969	173418	<0.1
28	13689487	92.71	13364846	132073	<0.1
29	18823579	92.73	18240013	2347661	<0.1
30	11589816	91.44	11296956	135137	<0.1
31	10696189	92.55	10475777	90290	<0.1
32	13542928	91.58	13200123	11812658	<0.1
33	9527251	89.37	9224520	130166	<0.1
34	12666575	94.21	12416522	87100	<0.1
35	14529926	93.93	14220317	370510	<0.1
36	22654641	91.59	22103235	806677	<0.1
37	8390757	89.67	8126991	78019	<0.1
38	10654133	92.13	10409347	279060	<0.1
39	10443542	91.3	10164060	115846	<0.1
40	10323193	89.28	9876708	7486744	<0.1
41	11822923	89.77	11421064	6279449	<0.1
42	17887946	90	17385214	136810	<0.1
43	6858375	87.69	6595014	395121	<0.1
44	14638814	89.94	14176417	174568	<0.1
45	8295579	89.01	8057780	127341	<0.1
46	20822764	89.36	20114545	267170	<0.1
47	13363745	88.97	12902465	180279	<0.1
48	11203001	89.66	10868508	139365	<0.1
49	15832711	89.9	15398818	194586	<0.1
50	25148503	92.38	24186539	262774	<0.1
51	8512497	89.01	8218978	120830	<0.1
52	10969994	91.46	10674515	121866	<0.1
53	11945600	94.74	11690308	102014	<0.1
54	16816238	92.87	16139994	803617	<0.1
55	25409123	93.69	24697672	2114211	17.6
56	28550654	93.96	27750062	339672	1.59
57	19027323	94.29	18579907	591813	87.4
58	26216007	94.58	25504850	322737	137
59	20458199	95.38	20044144	449887	11.6
60	23165175	95.26	22713065	301211	70.8
61	14951281	93.35	14525519	326111	146
62	12984950	95.46	12713065	316666	47.4
63	12215459	91.82	11778549	269694	124.4
64	13132628	90.84	12618907	1636041	7
65	23629386	90.23	22504824	1289646	10.2
66	11978470	93.33	11668695	142297	42
67	30185146	96.55	29708567	438883	98.6
68	10915161	90.12	10500936	268576	96.2
69	16571273	91.85	15992219	210851	12.1
70	15065448	91.53	14518404	2791360	4.1
71	16454997	93.42	16001062	246857	6.78
72	16615317	93.58	16189236	230993	45.6
73	17470426	92.75	16861946	2240230	5.7
74	15110325	93.13	14660279	231608	96.8
75	14143055	92.29	13265304	9869	<0.1
76	18040881	92.96	17024581	40738	<0.1
77	14180910	93.72	13805587	229429	<0.1
78	7846616	93.66	7635422	184173	<0.1
79	11506495	91.12	11096230	124971	<0.1
80	11450906	91.46	11153885	102601	<0.1
81	12225766	92.66	11796225	398661	8.86
82	14313645	91.85	13817364	353953	104
83	13342128	92.29	12909290	251192	118
84	11896252	91.7	11433230	2010132	1.6
85	8983018	92.03	8560845	1608413	<0.1
86	14099511	92.51	13624564	660625	16.9
87	13746258	92.53	13280587	430409	197
88	15006092	92.86	14457651	191142	1.85
89	14400049	89.43	13735836	5770958	2
90	12948118	93.13	12621947	195716	71.2
91	12333348	91.17	11880074	2105058	6.26
92	16165057	92.11	15640053	250016	81.2
93	15458456	92.03	14904347	216392	78.6
94	11816886	92.9	11379889	133518	78
95	14809785	91.55	14233267	327774	168
96	14860043	93.28	14476012	214821	79.2
97	14010926	89.33	13347681	190208	24
98	22516685	92.03	21727132	2752604	2.34
99	12499640	92.62	12115156	904027	2.76
100	10517109	91.91	10157486	116819	7.46
101	16243661	91.83	15684583	178180	28.8
102	28413910	93.45	27734087	346736	64.4
